# Supplementary material for: Performance analysis of regional AquaCrop (v6.1) biomass and surface soil moisture simulations using satellite and in situ observations
Source: Copernicus journal article supplement (doi:10.5194/gmd-2021-98), 2021-05-17
Supplement: Supplementary file [file gmd-2021-98-AC2-supplement.pdf]

**L216: all metrics should be described with equations. To me, at least, it is unclear how anomalies were computed or how the bias was removed – it seems there are different options to do so.**

Answer: The following equations will be added to the revised manuscript:

$$Bias = \frac{1}{N} \sum_{n=1}^N (x_n - y_n)$$

$$RMSD = \sqrt{\frac{1}{N} \sum_{n=1}^N (x_n - y_n)^2}$$

$$ubRMSD = \sqrt{RMSD^2 - bias^2}$$

$$R = \frac{\frac{1}{N} \sum_{n=1}^N (x_n - \bar{x})(y_n - \bar{y})}{\sqrt{(\sum_{n=1}^N (x_n - \bar{x})^2)(\sum_{n=1}^N (y_n - \bar{y})^2)}}$$

Where x are the simulated output data from AquaCrop and y are the observations from the satellite products.  $\bar{x}$  and  $\bar{y}$  are the time mean values.
